# Supplementary material for: Perfluorocarbon Enhanced Glasgow Oxygen Level Dependent (GOLD) Magnetic Resonance Metabolic Imaging Identifies the Penumbra Following Acute Ischemic Stroke
Source: PubMed Central journal article supplement (PMC5858177; doi:10.7150/thno.21685), 2018-02-12
Supplement: thnov08p1706s1.pdf [file thnov08p1706s1.pdf]

**Supplementary Information**

**Perfluorocarbon Enhanced Glasgow Oxygen Level Dependent (GOLD)  
Magnetic Resonance Metabolic Imaging Identifies the Penumbra Following  
Acute Ischemic Stroke.**

**Graeme A Deuchar<sup>1,3</sup>, David Brennan<sup>2,3</sup>, William M Holmes<sup>1</sup>, Martin Shaw<sup>4</sup>, I  
Mhairi Macrae<sup>1</sup>, Celestine Santosh<sup>2,3</sup>.**

<sup>1</sup>Glasgow Experimental MRI Centre, Institute of Neuroscience and Psychology,  
College of Medical, Veterinary and Life Sciences, University of Glasgow;

<sup>2</sup>Department of Neuroradiology, Institute of Neurological Sciences, Southern General  
Hospital, Glasgow, UK; <sup>3</sup>Aurum Biosciences Ltd, 20-23 Woodside Place, Glasgow,  
G3 7QL. <sup>4</sup>Clinical Physics, University of Glasgow, Western Infirmary, Glasgow,  
United Kingdom.

Address for correspondence:

Dr Graeme Deuchar,  
Aurum Biosciences Ltd,  
20-23 Woodside Place,  
Glasgow, G3 7QL,  
Scotland, UK

Tel: +44 141 582 1212

Email: [gdeuchar@aurumbiosciences.com](mailto:gdeuchar@aurumbiosciences.com)

|                          | Saline (4.5 mL/kg) |             | Oxygen Challenge |                     | b-PFC (4.5 mL/kg) |              | Oxygen Challenge |                     |
|--------------------------|--------------------|-------------|------------------|---------------------|-------------------|--------------|------------------|---------------------|
|                          | Baseline           | During      | Baseline         | 100% O <sub>2</sub> | Baseline          | During       | Baseline         | 100% O <sub>2</sub> |
| MABP (mmHg)              | 89.4 ± 4.4         | 91.0 ± 4.5* | 86.6 ± 6.0       | 101.0 ± 5.4**       | 82.8 ± 5.6        | 89.7 ± 7.0** | 78.6 ± 7.8       | 95.1 ± 10.7**       |
| PaO <sub>2</sub> (mmHg)  |                    |             | 87.4 ± 7.7       | 322.6 ± 33.0**      |                   |              | 89.5 ± 8.4       | 333.8 ± 36.4**      |
| PaCO <sub>2</sub> (mmHg) |                    |             | 33.0 ± 6.1       | 38.5 ± 9.7          |                   |              | 32.1 ± 7.0       | 36.0 ± 11.4         |

**Table S1:** Physiological parameters (n=6-9) before (baseline) and during either saline or b-PFC administration (4.5 mL/kg. i.v) and before and during hyperoxic oxygen challenge (100% O<sub>2</sub>). Data are expressed as mean ± s.d. \*p<0.05; \*\*p<0.01, Significant increase in MABP and PaO<sub>2</sub> compared to corresponding baseline value, Student's paired *t*-test.

|                          | O-PFC (4.5 mL/kg) |               | 1 <sup>st</sup> Oxygen Challenge |                    |                     | 2 <sup>nd</sup> Oxygen Challenge |                    |                     |
|--------------------------|-------------------|---------------|----------------------------------|--------------------|---------------------|----------------------------------|--------------------|---------------------|
|                          | Baseline          | During        | Baseline                         | 50% O <sub>2</sub> | 100% O <sub>2</sub> | Baseline                         | 50% O <sub>2</sub> | 100% O <sub>2</sub> |
| MABP (mmHg)              | 92.1 ± 6.4        | 100.1 ± 8.9** | 88.7 ± 6.6                       | 101.8 ± 6.8**      | 102.6 ± 6.4**       | 93.0 ± 8.9                       | 104.8 ± 8.2**      | 102.2 ± 9.8**       |
| PaO <sub>2</sub> (mmHg)  |                   |               | 87.8 ± 6.0                       |                    | 366.8 ± 35.1**      | 89.5 ± 8.4                       |                    | 333.8 ± 36.4**      |
| PaCO <sub>2</sub> (mmHg) |                   |               | 41.0 ± 12.2                      |                    | 42.0 ± 8.3          | 41.0 ± 12.2                      |                    | 42.0 ± 8.3          |

**Table S2:** Physiological parameters (n=6-9) before (baseline) and during O-PFC administration (4.5 mL/kg. i.v) and before and during hyperoxic oxygen challenges (50% & 100% O<sub>2</sub>). Data are expressed as mean ± s.d. \*\*p<0.01. Significant increase in MABP and PaO<sub>2</sub> compared to corresponding baseline value, Student's paired *t*-test.

**Figure S1.**

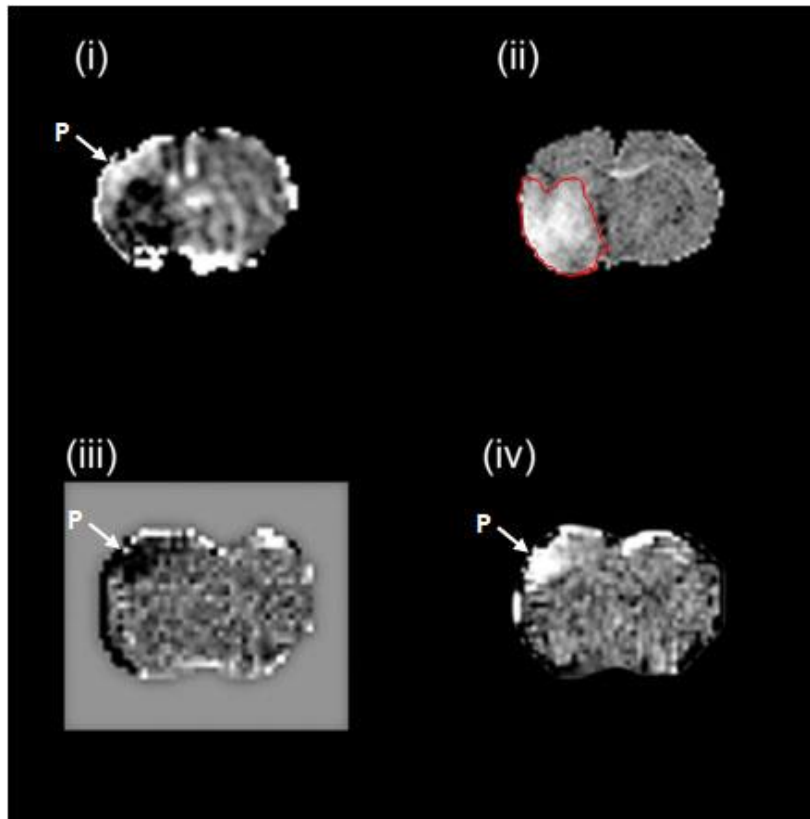

**Figure S1.** Four matching images demonstrating the automated image processing showing co-registered variants of the analyses performed in Study 2: (i) T2\* signal change map (50% O<sub>2</sub>), (ii) Autoradiography image with area of decreased glucose use outlined in red, (iii) Aerobic lactate change map (ventilation changed from air to O<sub>2</sub>) and (iv) Anaerobic lactate change map (ventilation changed from O<sub>2</sub> back to air). P indicates penumbra.
